# Supplementary material for: Vegan versus meat-based pet foods: Owner-reported palatability behaviours and implications for canine and feline welfare
Source: PubMed Central journal article supplement (PMC8208530; doi:10.1371/journal.pone.0253292), 2021-06-16
Supplement: pone.0253292.s001.pdf [file pone.0253292.s001.pdf]

## S1 Appendix – Canine palatability indicators (10)

---

1. Eats Quickly
2. Approach
3. Wag tail
4. Sniffs Food
5. Jump
6. Vocalise
7. Salivate
8. Licks lips
9. Stays near bowl
10. Guards food

Nb: Lack of reporting in some cases reduced total numbers, in some following Tables and Figures.

# 1. Ate quickly

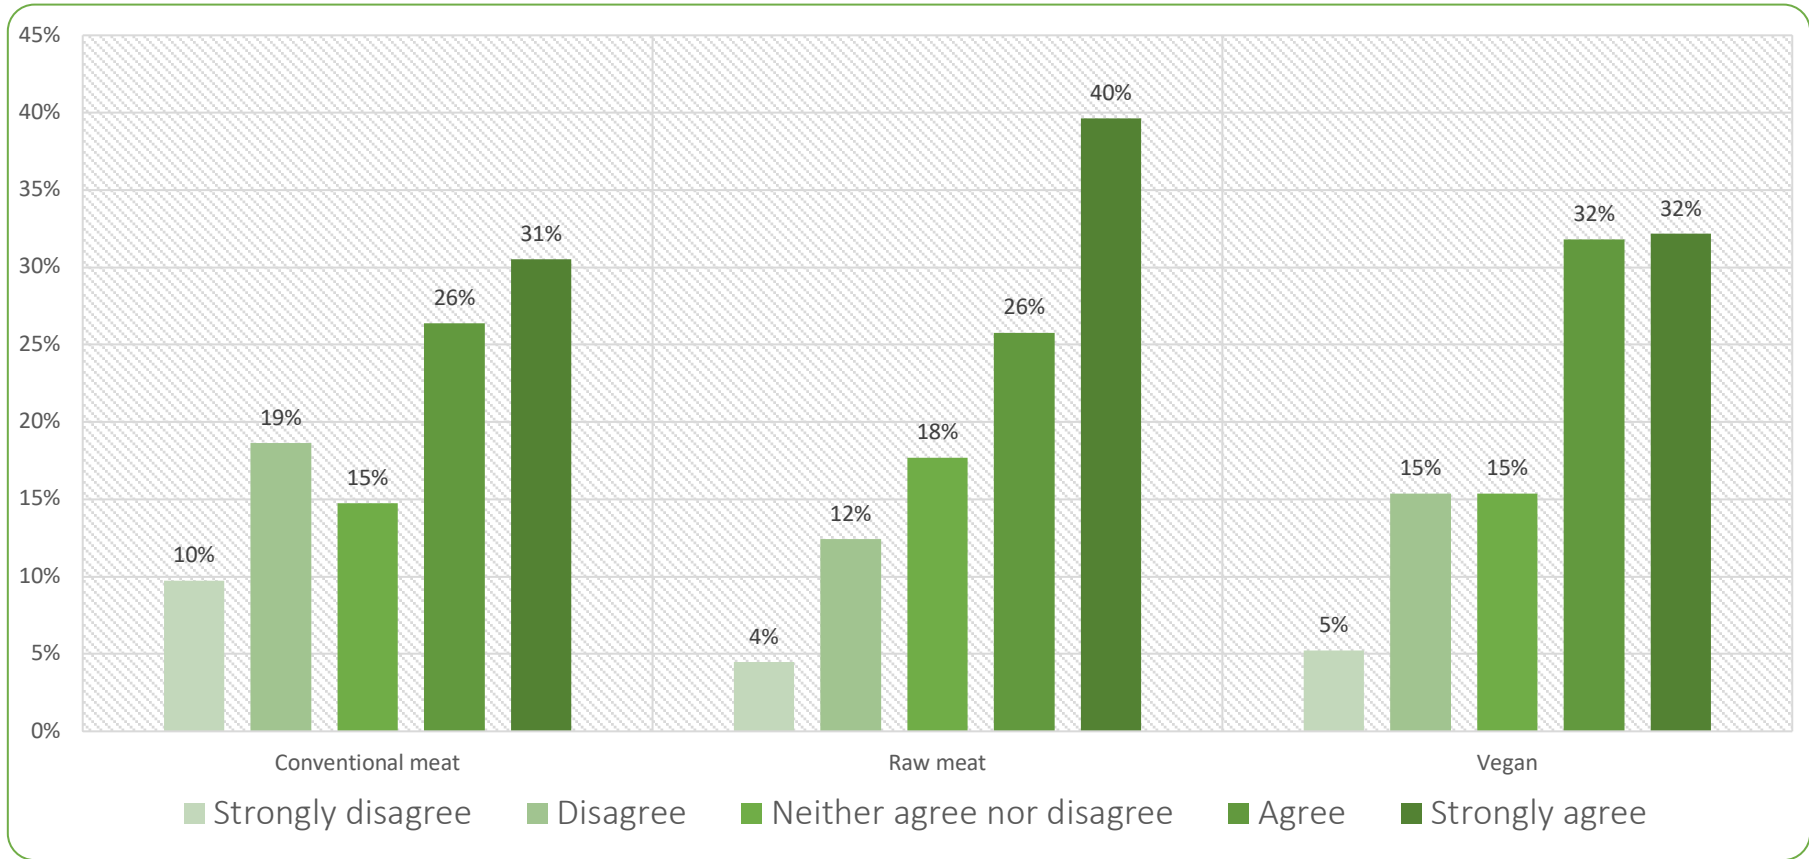

Figure A1. Percentage of dogs who ate quickly.

Table A1. Numbers of dogs who ate quickly.

| Agreement level            | Conventional meat | Raw meat | Vegan | Total |
|----------------------------|-------------------|----------|-------|-------|
| Strongly disagree          | 123               | 34       | 15    | 172   |
| Disagree                   | 235               | 94       | 44    | 373   |
| Neither agree nor disagree | 186               | 134      | 44    | 364   |
| Agree                      | 333               | 195      | 91    | 619   |
| Strongly agree             | 385               | 300      | 92    | 777   |
| Total                      | 1262              | 757      | 286   | 2305  |

## 2. Approached meals rapidly

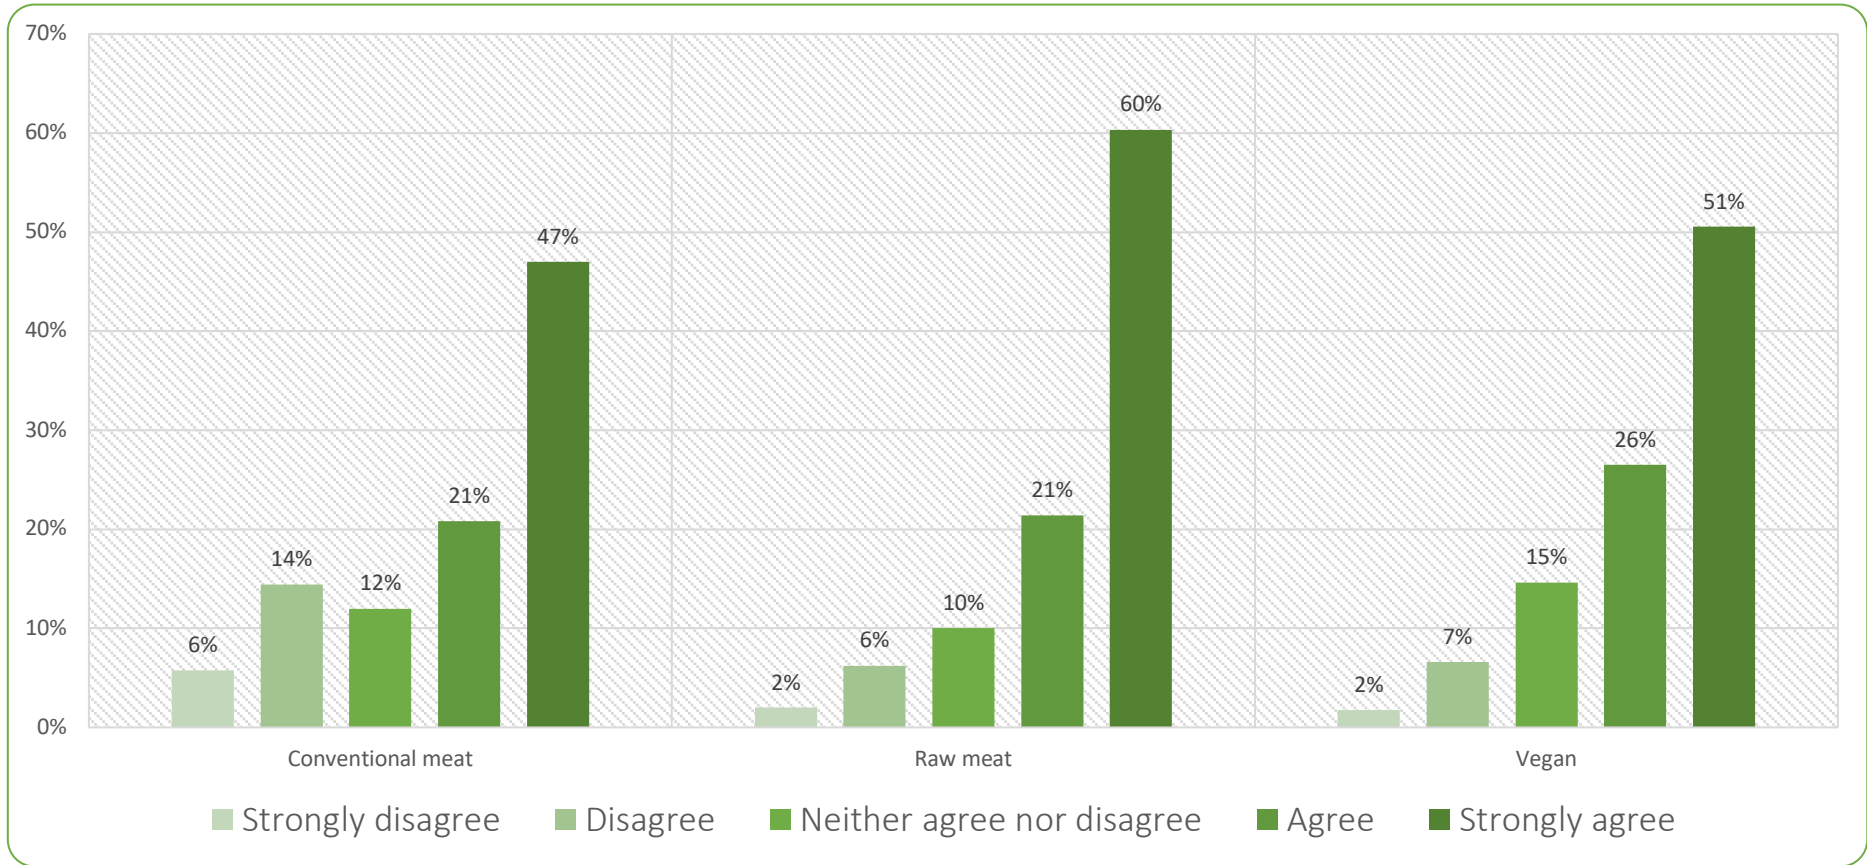

Figure A2. Percentage of dogs who approached meals rapidly.

Table A2. Numbers of dogs who approached meals rapidly.

| Agreement level            | Conventional meat | Raw meat | Vegan | Total |
|----------------------------|-------------------|----------|-------|-------|
| Strongly disagree          | 73                | 15       | 5     | 93    |
| Disagree                   | 182               | 47       | 19    | 248   |
| Neither agree nor disagree | 151               | 76       | 42    | 269   |
| Agree                      | 262               | 162      | 76    | 500   |
| Strongly agree             | 592               | 456      | 145   | 1193  |
| Total                      | 1260              | 756      | 287   | 2303  |

### 3. Wagged tail

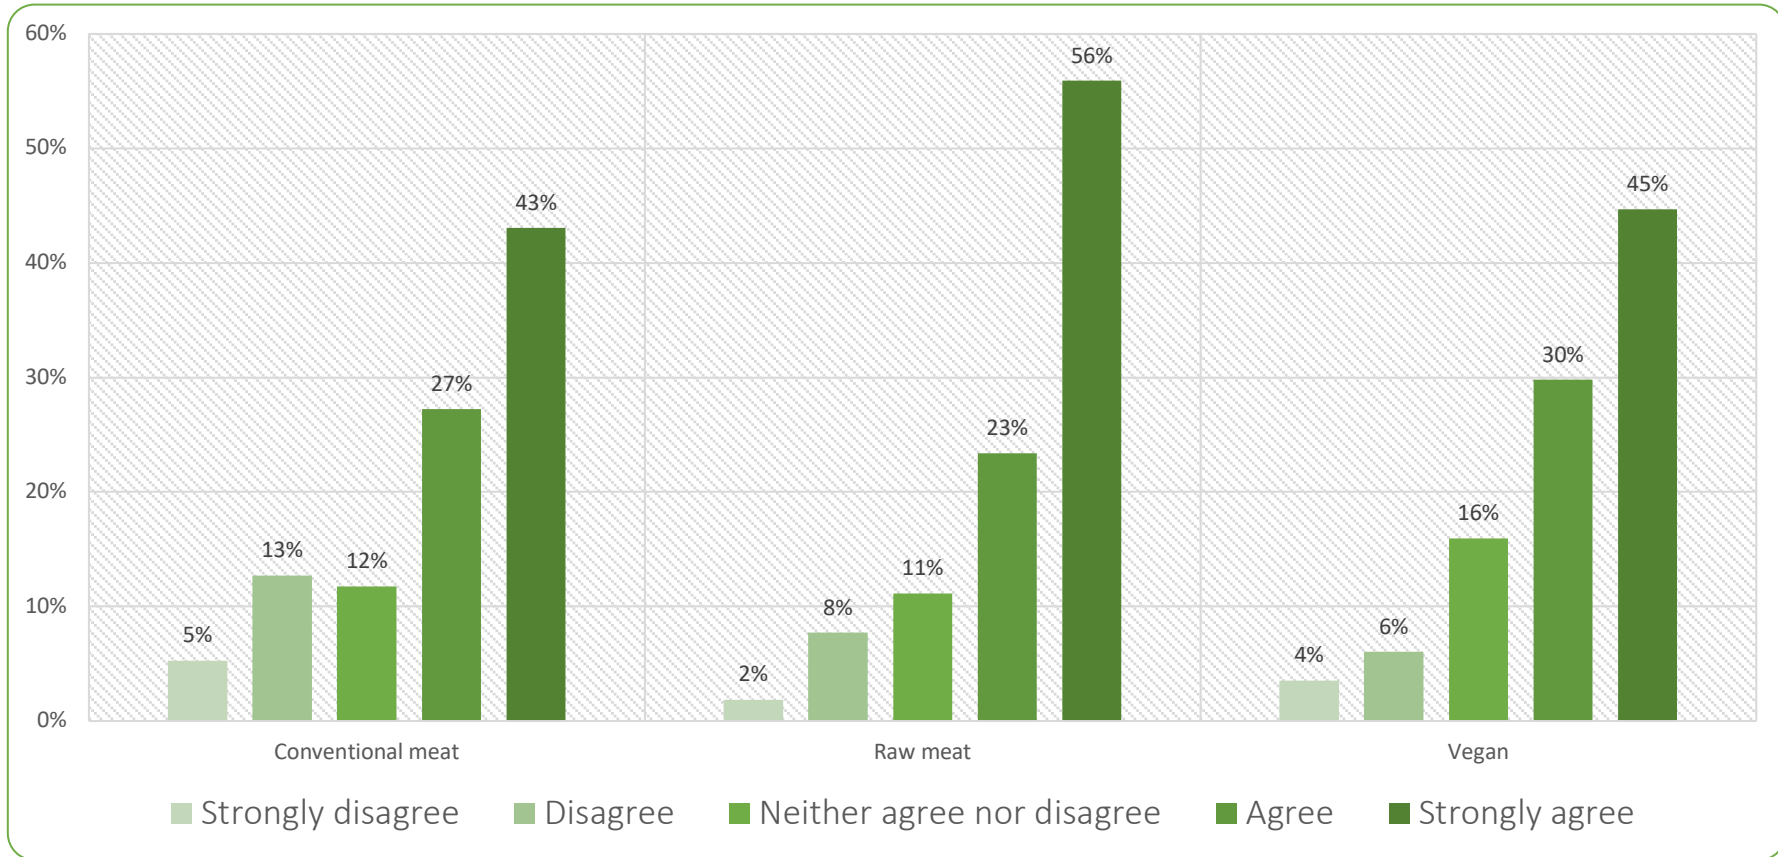

Figure A3. Percentage of dogs who wagged their tails.

Table A3. Numbers of dogs who wagged their tails.

| Agreement level            | Conventional meat | Raw meat | Vegan | Total |
|----------------------------|-------------------|----------|-------|-------|
| Strongly disagree          | 66                | 14       | 10    | 90    |
| Disagree                   | 159               | 58       | 17    | 234   |
| Neither agree nor disagree | 147               | 84       | 45    | 276   |
| Agree                      | 341               | 176      | 84    | 601   |
| Strongly agree             | 539               | 421      | 126   | 1086  |
| Total                      | 1252              | 753      | 282   | 2287  |

#### 4. Sniffed or investigated food

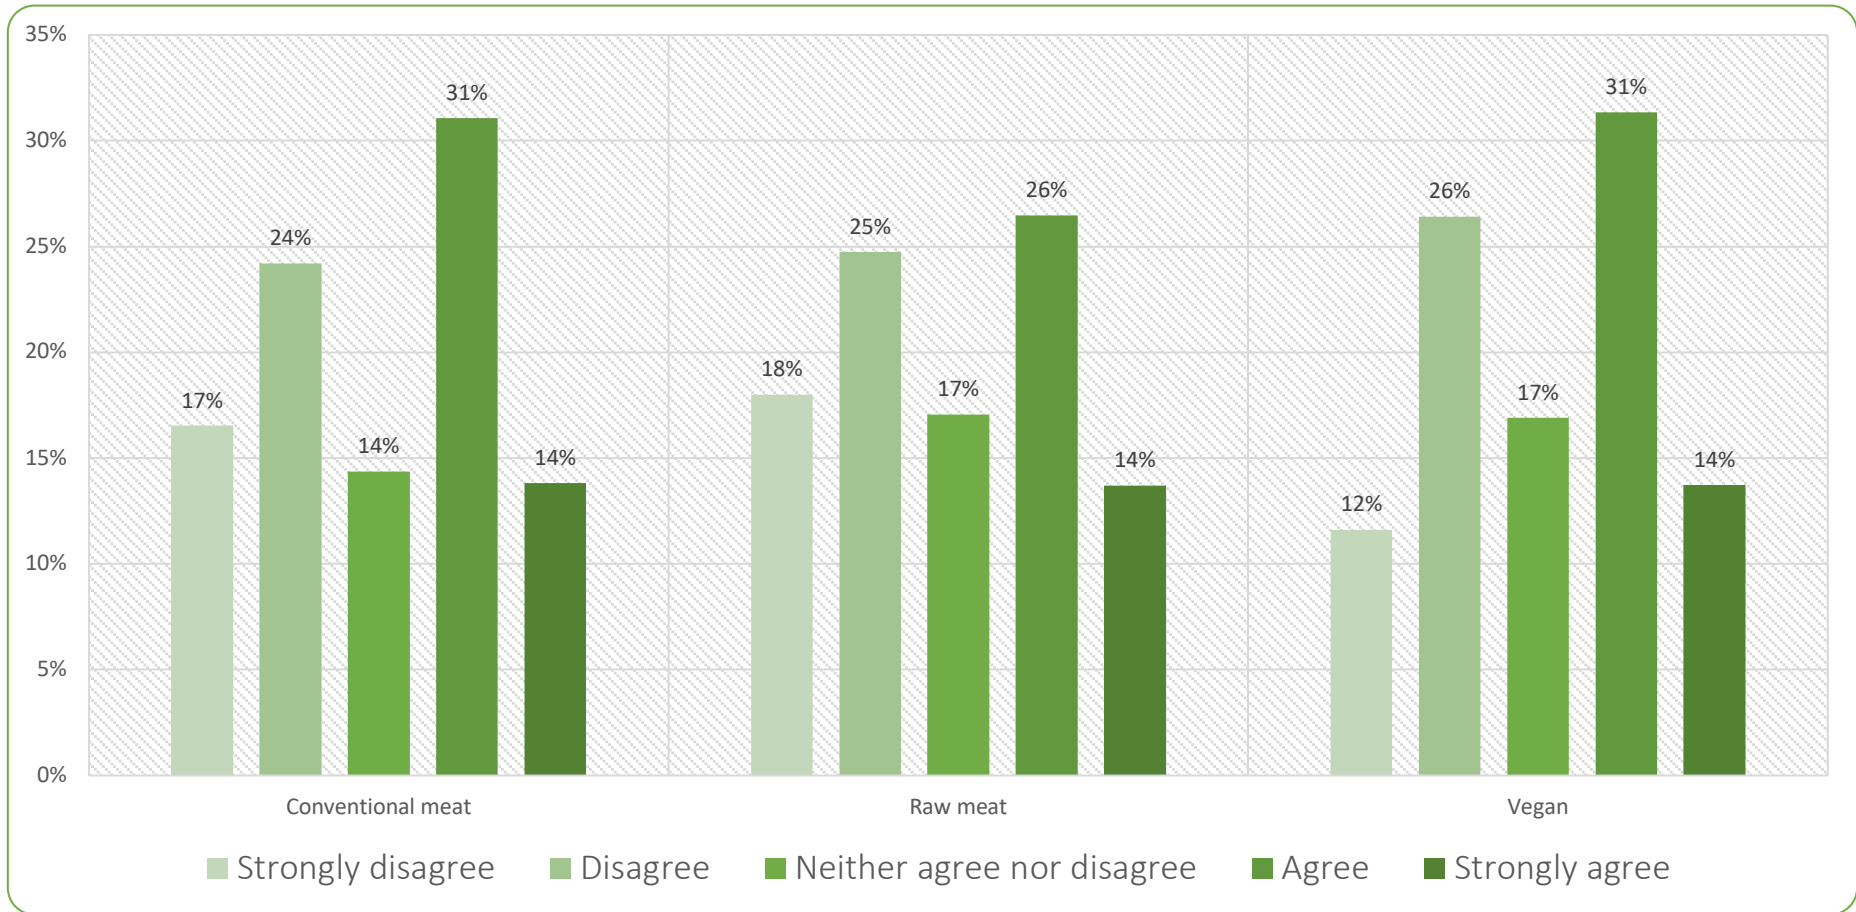

Figure A4. Percentage of dogs who sniffed or investigated food.



Table A4. Numbers of dogs who sniffed or investigated food.

| Agreement level            | Conventional meat | Raw meat | Vegan | Total |
|----------------------------|-------------------|----------|-------|-------|
| Strongly disagree          | 207               | 134      | 33    | 374   |
| Disagree                   | 303               | 184      | 75    | 562   |
| Neither agree nor disagree | 180               | 127      | 48    | 355   |
| Agree                      | 389               | 197      | 89    | 675   |
| Strongly agree             | 173               | 102      | 39    | 314   |
| Total                      | 1252              | 744      | 284   | 2280  |

## 5. Jumped

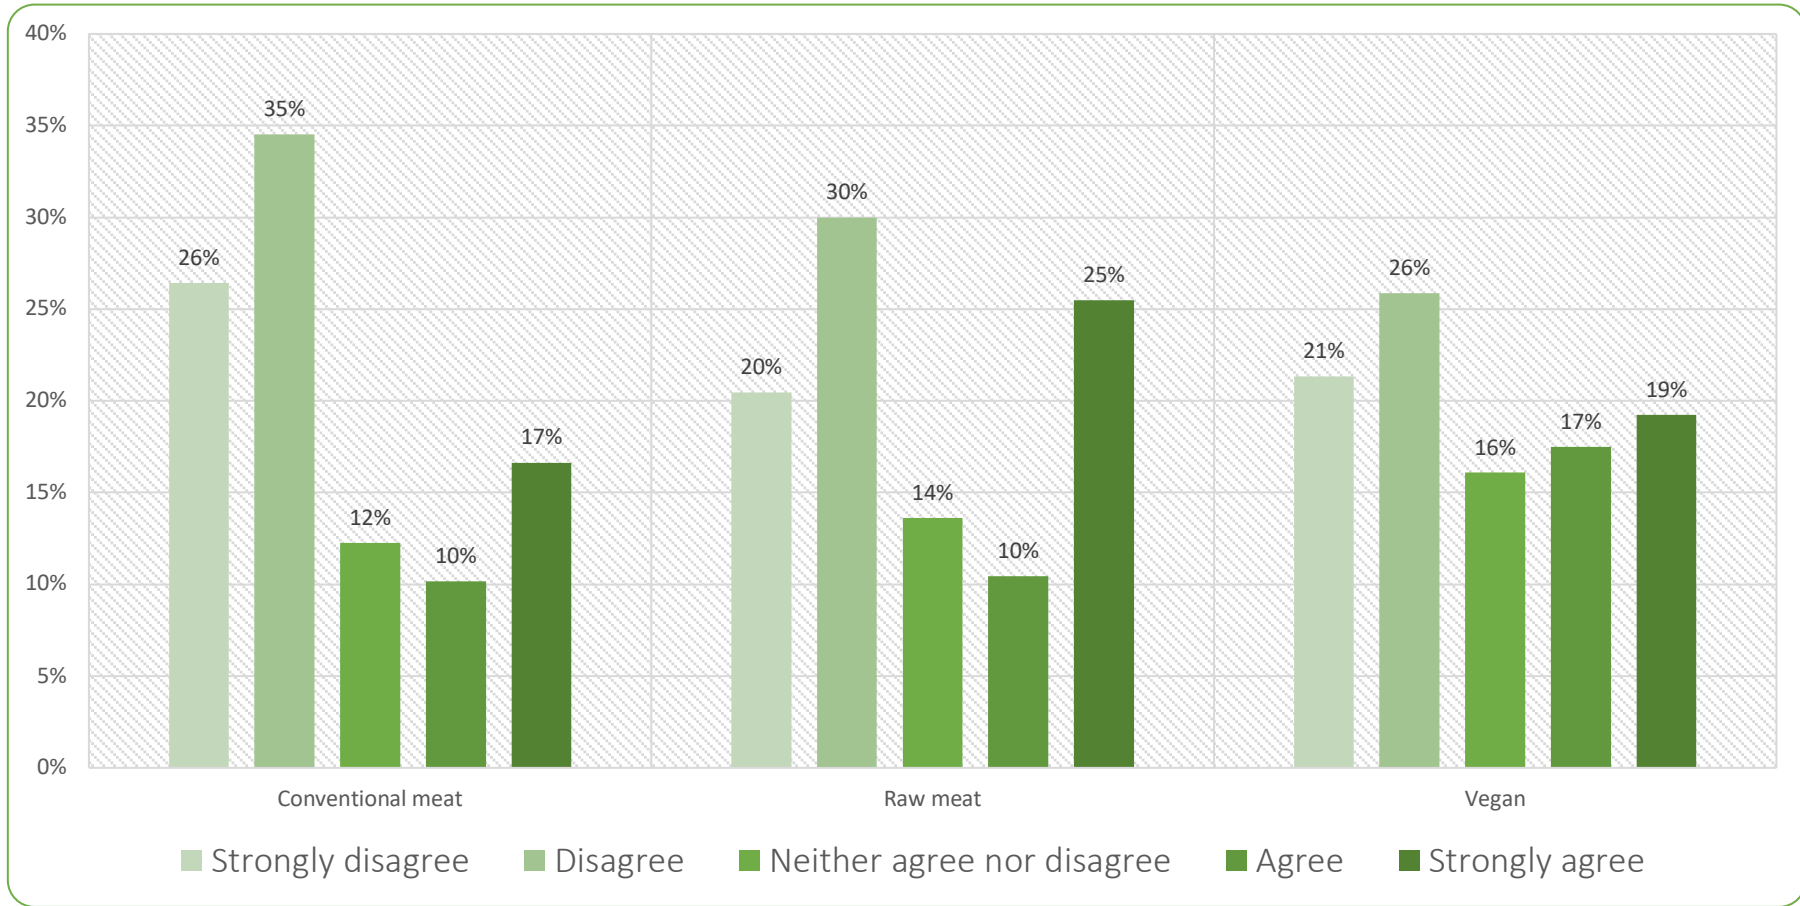

Figure A5. Percentage of dogs who jumped.

Table A5. Numbers of dogs who jumped.

| Agreement level            | Conventional meat | Raw meat | Vegan | Total |
|----------------------------|-------------------|----------|-------|-------|
| Strongly disagree          | 332               | 155      | 61    | 548   |
| Disagree                   | 434               | 227      | 74    | 735   |
| Neither agree nor disagree | 154               | 103      | 46    | 303   |
| Agree                      | 128               | 79       | 50    | 257   |
| Strongly agree             | 209               | 193      | 55    | 457   |
| Total                      | 1257              | 757      | 286   | 2300  |

## 6. Barked or vocalised

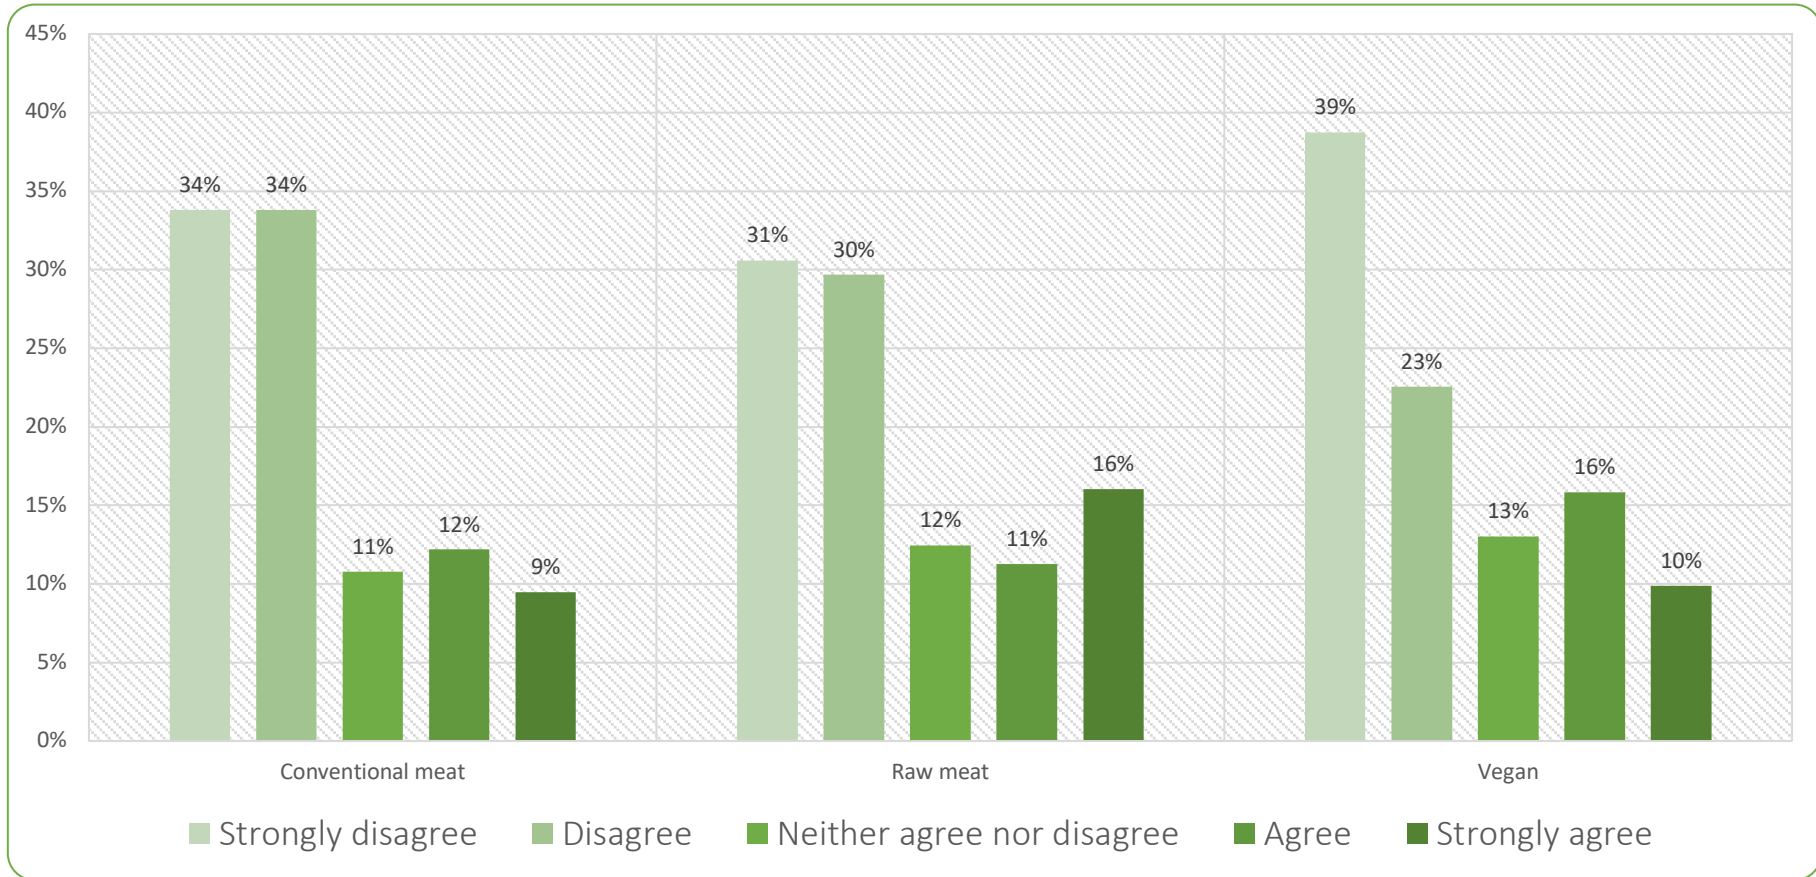

Figure A6. Percentage of dogs who barked or vocalised.

Table A6. Numbers of dogs who barked or vocalised.

| Agreement level            | Conventional meat | Raw meat | Vegan | Total |
|----------------------------|-------------------|----------|-------|-------|
| Strongly disagree          | 424               | 231      | 110   | 765   |
| Disagree                   | 424               | 224      | 64    | 712   |
| Neither agree nor disagree | 135               | 94       | 37    | 266   |
| Agree                      | 153               | 85       | 45    | 283   |
| Strongly agree             | 119               | 121      | 28    | 268   |
| Total                      | 1255              | 755      | 284   | 2294  |

## 7. Obviously salivated

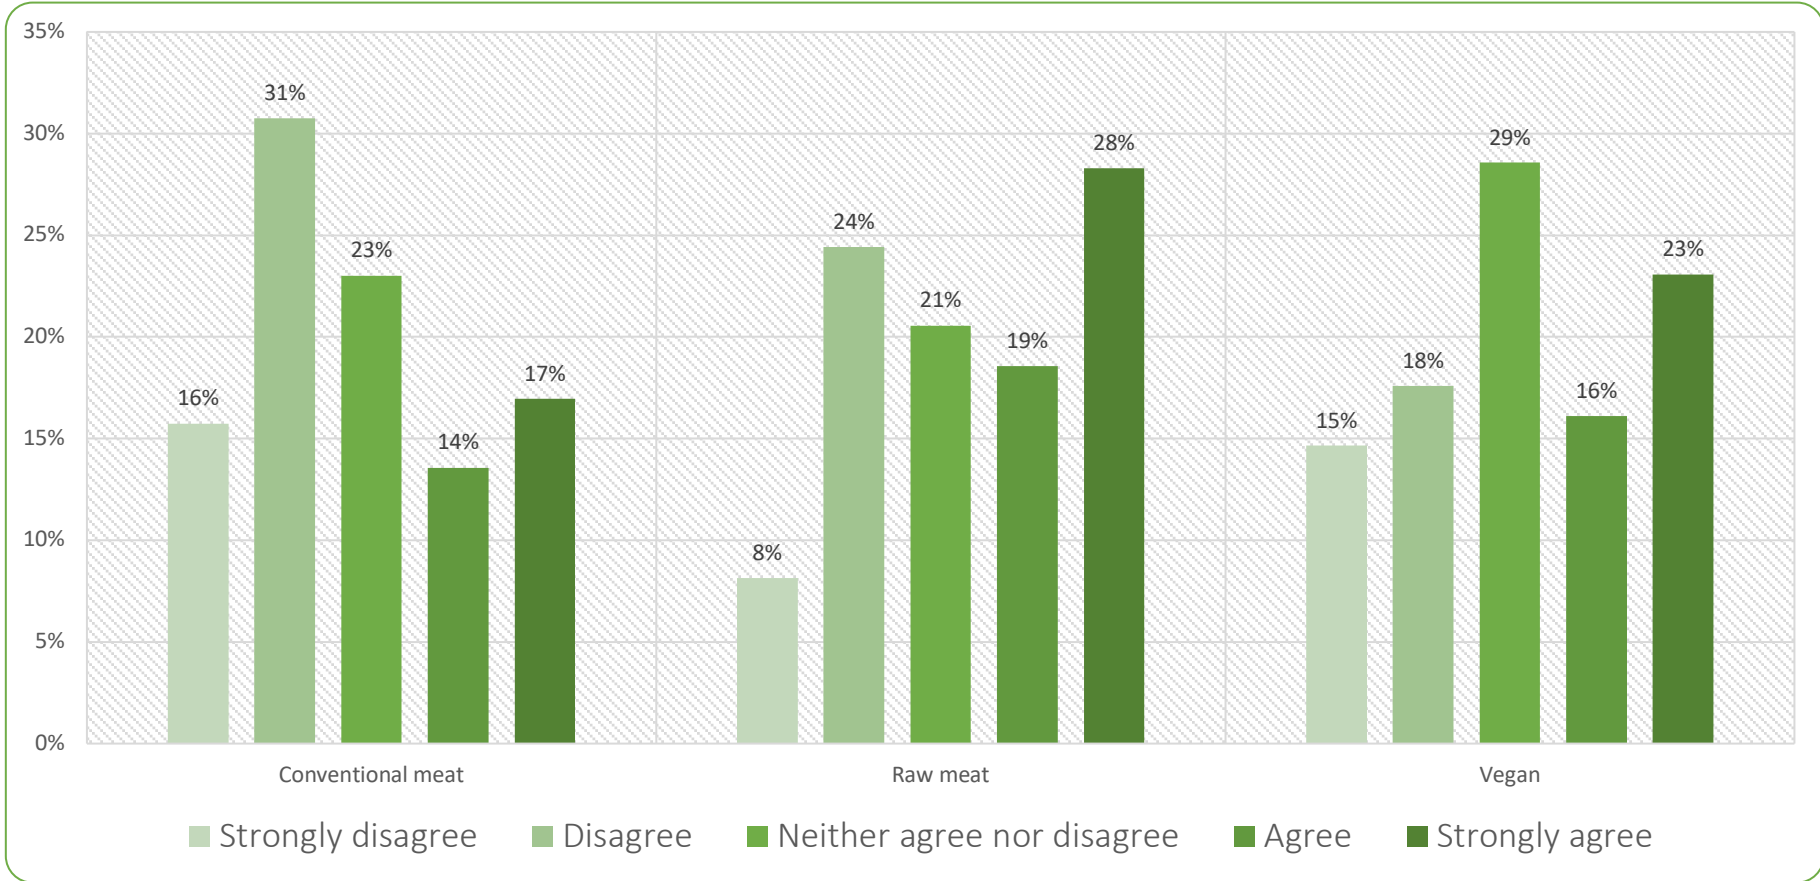

Figure A7. Percentage of dogs who obviously salivated.

Table A7. Numbers of dogs who obviously salivated.

| Agreement level            | Conventional meat | Raw meat | Vegan | Total |
|----------------------------|-------------------|----------|-------|-------|
| Strongly disagree          | 195               | 61       | 40    | 296   |
| Disagree                   | 381               | 183      | 48    | 612   |
| Neither agree nor disagree | 285               | 154      | 78    | 517   |
| Agree                      | 168               | 139      | 44    | 351   |
| Strongly agree             | 210               | 212      | 63    | 485   |
| Total                      | 1239              | 749      | 273   | 2261  |

## 8. Licked lips

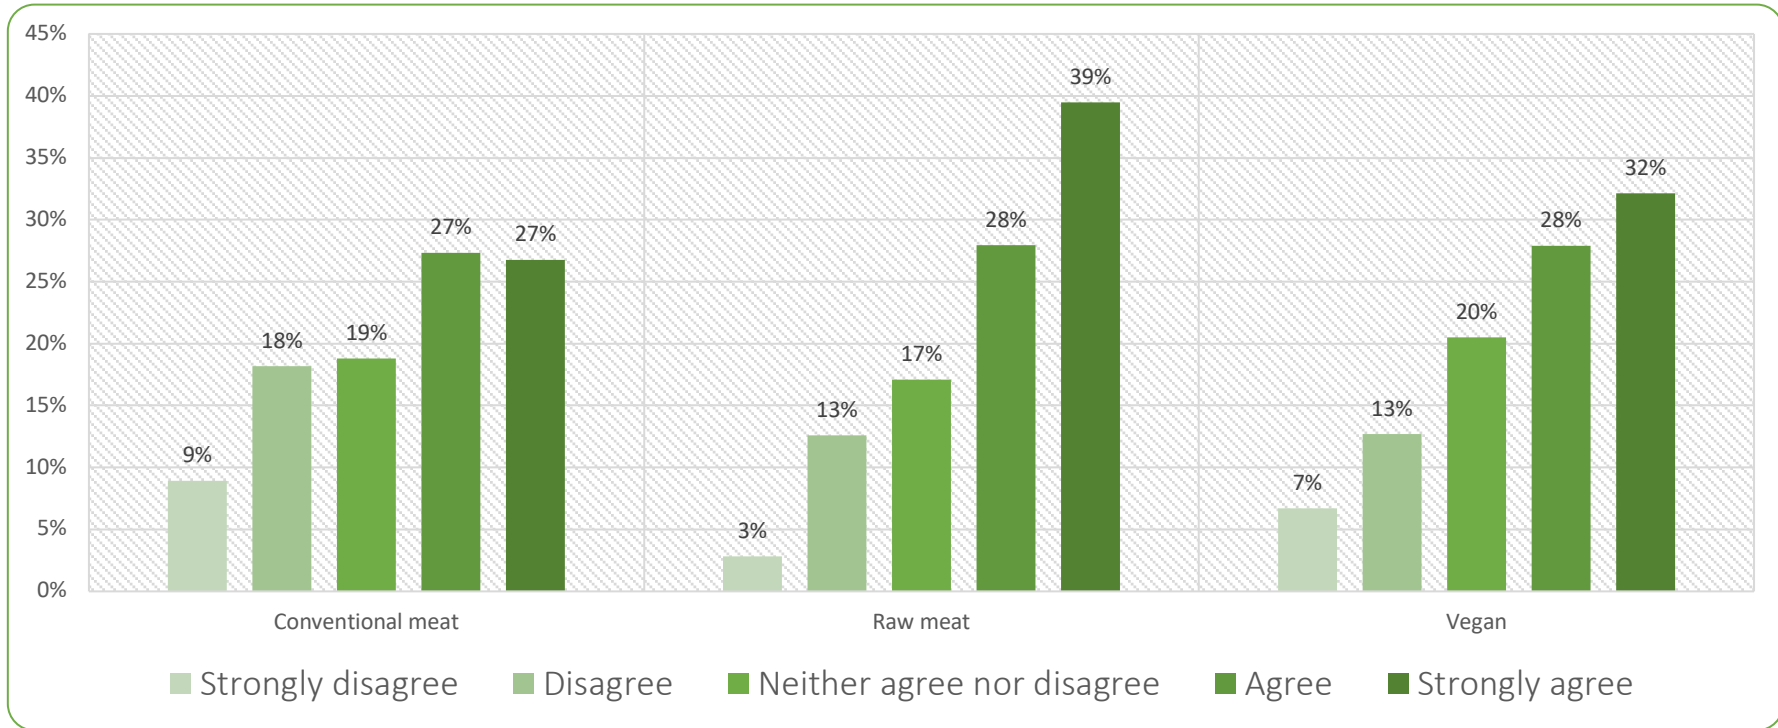

Figure A8. Percentage of dogs who licked their lips.



Table A8. Numbers of dogs who licked their lips.

| Agreement level            | Conventional meat | Raw meat | Vegan | Total |
|----------------------------|-------------------|----------|-------|-------|
| Strongly disagree          | 109               | 21       | 19    | 149   |
| Disagree                   | 222               | 93       | 36    | 351   |
| Neither agree nor disagree | 230               | 126      | 58    | 414   |
| Agree                      | 334               | 206      | 79    | 619   |
| Strongly agree             | 327               | 291      | 91    | 709   |
| Total                      | 1222              | 737      | 283   | 2242  |

## 9. Remained near food bowl

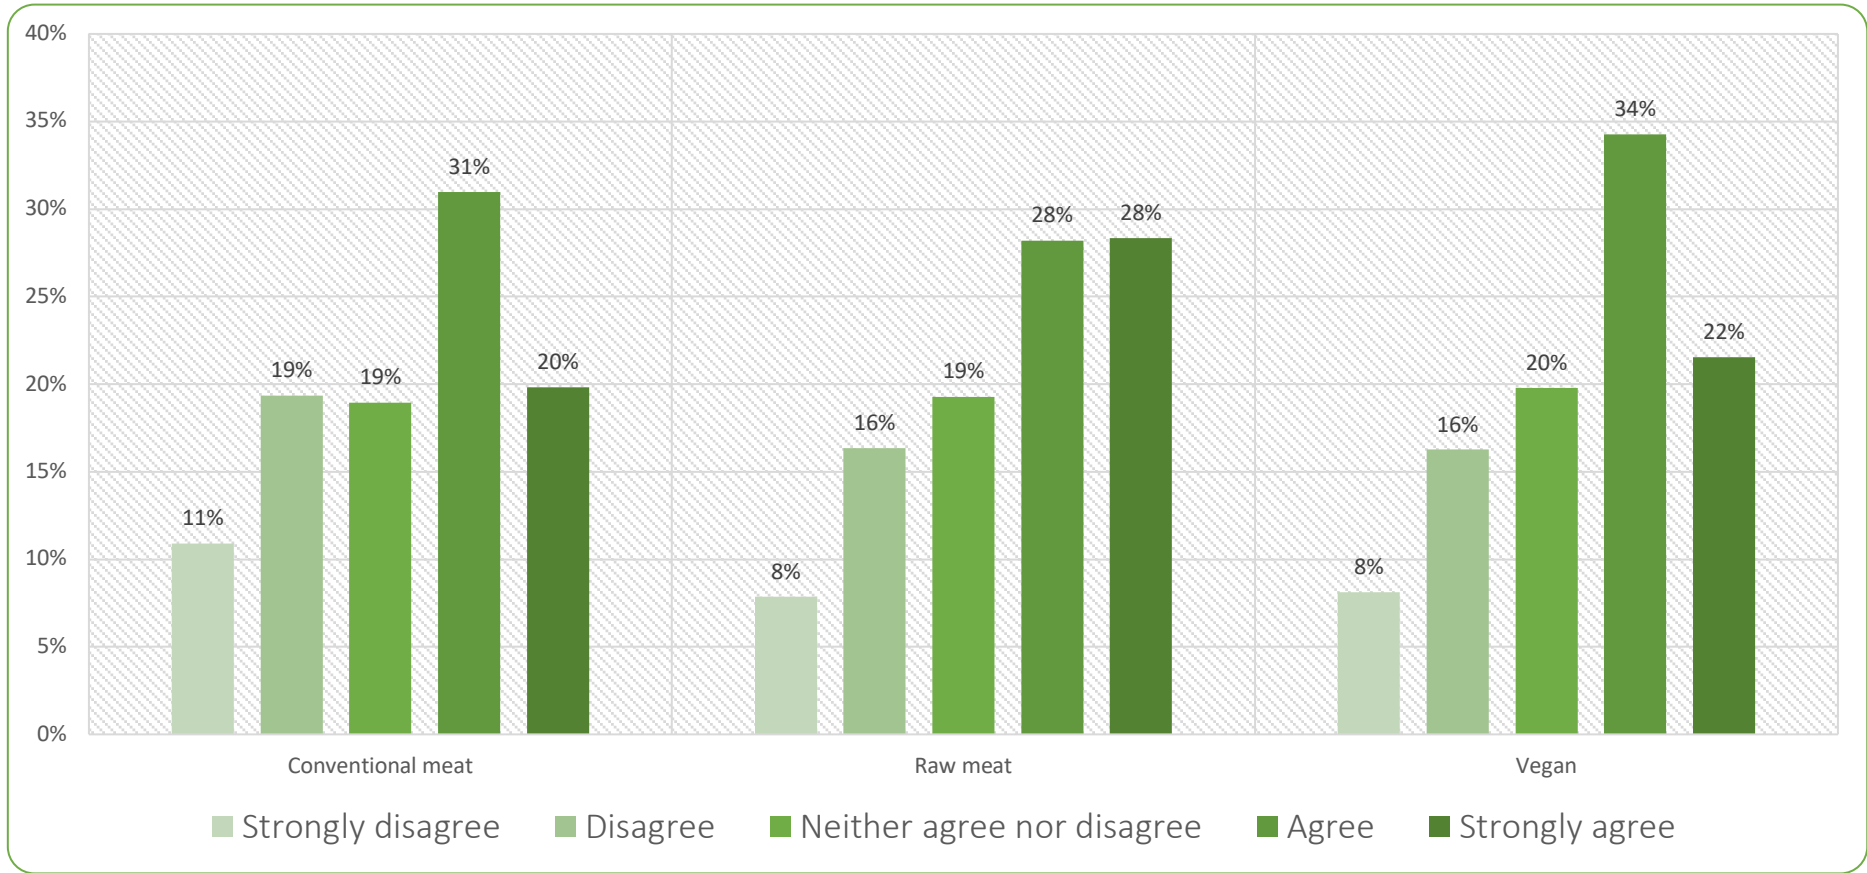

Figure A9. Percentage of dogs who remained near their food bowl.

Table A9. Numbers of dogs who remained near their food bowl.

| Agreement level            | Conventional meat | Raw meat | Vegan | Total |
|----------------------------|-------------------|----------|-------|-------|
| Strongly disagree          | 137               | 59       | 23    | 219   |
| Disagree                   | 243               | 123      | 46    | 412   |
| Neither agree nor disagree | 238               | 145      | 56    | 439   |
| Agree                      | 389               | 212      | 97    | 698   |
| Strongly agree             | 249               | 213      | 61    | 523   |
| Total                      | 1256              | 752      | 283   | 2291  |

## 10. Guarded food

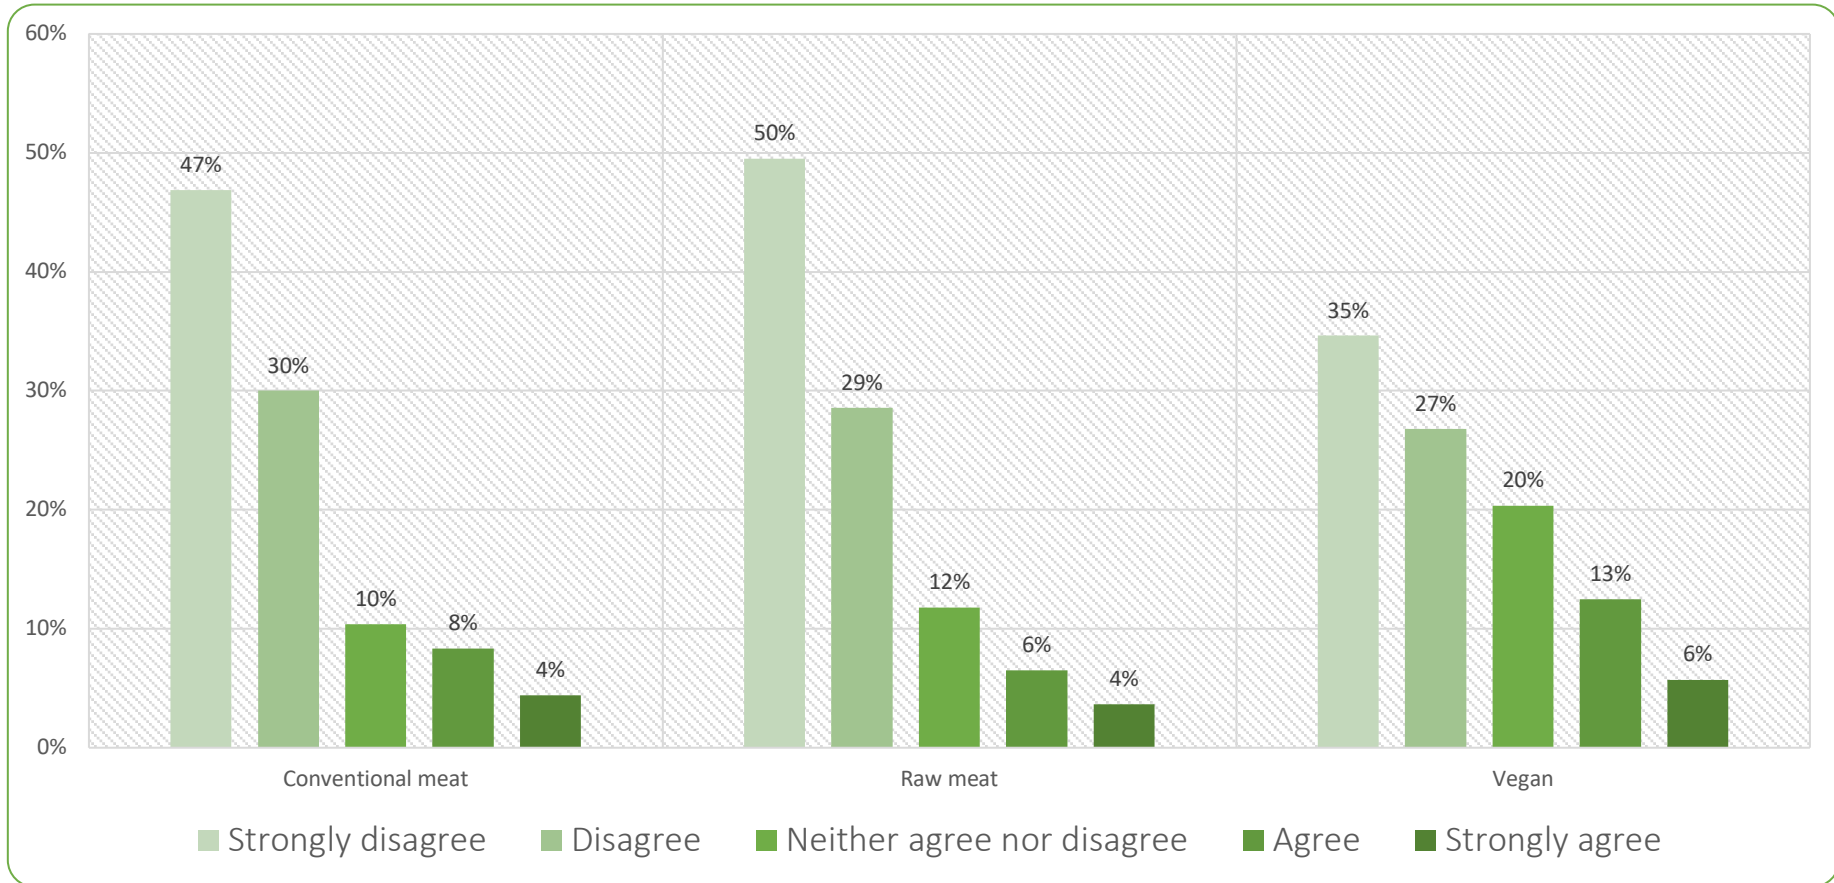

Figure A10. Percentage of dogs who guarded their food.

Table A10. Numbers of dogs who guarded their food.

| Agreement level            | Conventional meat | Raw meat | Vegan | Total |
|----------------------------|-------------------|----------|-------|-------|
| Strongly disagree          | 573               | 366      | 97    | 1036  |
| Disagree                   | 367               | 211      | 75    | 653   |
| Neither agree nor disagree | 127               | 87       | 57    | 271   |
| Agree                      | 102               | 48       | 35    | 185   |
| Strongly agree             | 54                | 27       | 16    | 97    |
| Total                      | 1223              | 739      | 280   | 2242  |
